# Supplementary material for: Original Leaf Colonisers Shape Fungal Decomposer Communities of Phragmites australis in Intermittent Habitats
Source: MDPI journal article supplement (doi:10.3390/jof8030284), 2022-03-10
Supplement: s1 [file s1]

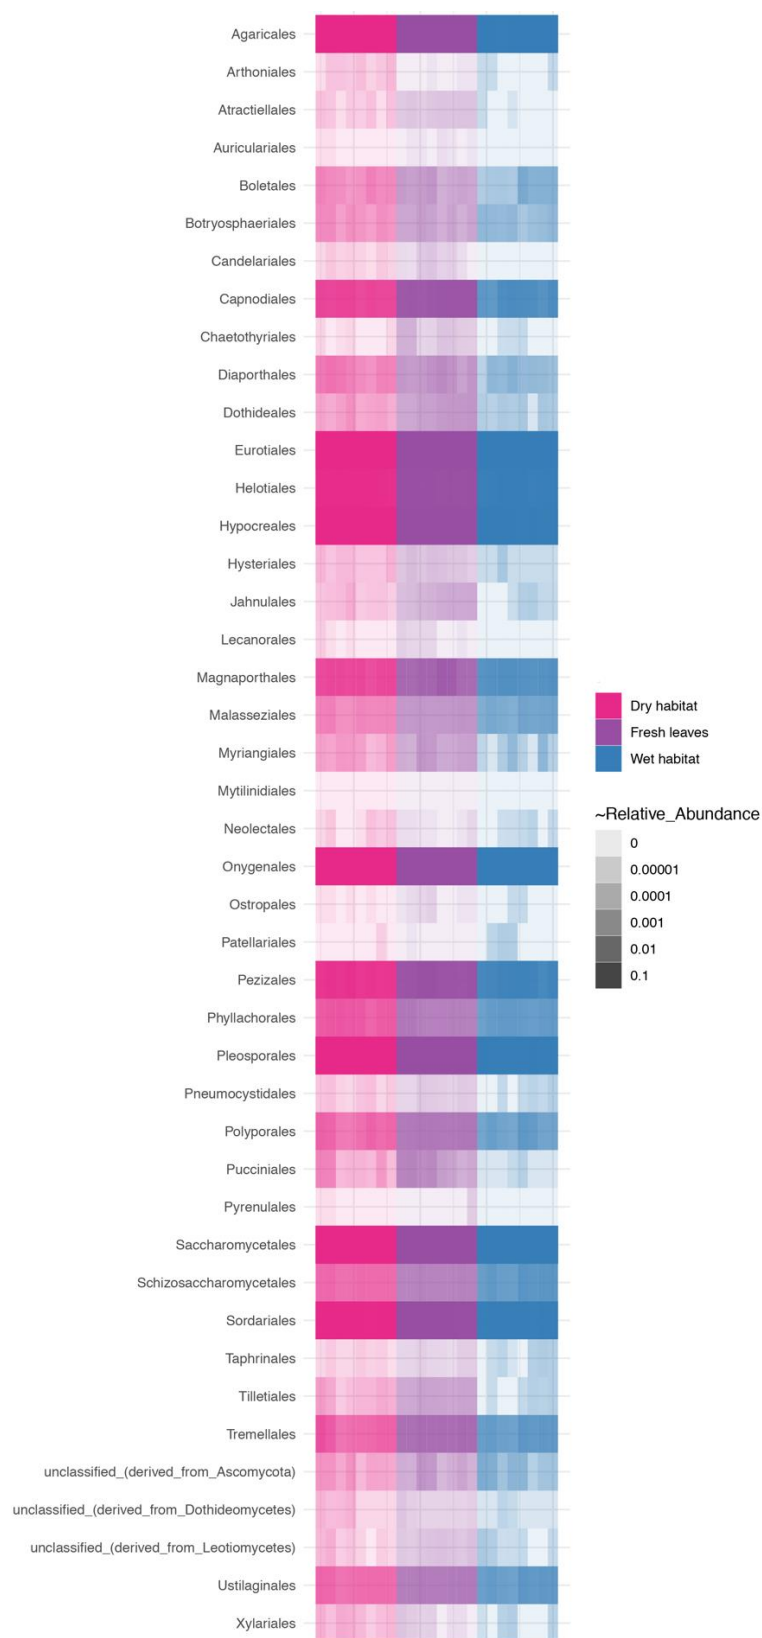

**Supplementary Figure S1.** Scaled relative abundance of all OTUs from the fresh leaves and leaves decomposing in either wet or dry habitat. Individual tiles represent the individual samples (total N = 24).

**Supplementary Table S1.** Node degrees for keystone OTUs for individual location's meta-networks, defined as nodes within the top 5% of node degree values of each network.

|              | <b>Fresh<br/>leaves</b> | <b>Dry<br/>habitat</b> | <b>Wet<br/>habitat</b> |
|--------------|-------------------------|------------------------|------------------------|
| Ajellomyces  |                         |                        | 18                     |
| Arthroderma  | 20                      |                        |                        |
| Aspergillus  |                         |                        | 18                     |
| Botryotinia  | 20                      |                        |                        |
| Chaetomium   |                         |                        | 18                     |
| Coccidioides |                         |                        | 18                     |
| Gibberella   | 20                      |                        |                        |
| Magnaporthe  |                         |                        | 18                     |
| Neurospora   |                         |                        | 18                     |
| Podospora    |                         |                        | 18                     |
| Talaromyces  | 20                      | 21                     | 18                     |
| Uncinocarpus | 20                      |                        | 18                     |
| Verticillium |                         |                        | 18                     |
